# Supplementary material for: Histidine-triggered turning-on of gold/copper nanocluster fluorescence for the sensitive and selective detection of histidine
Source: Royal Society of Chemistry journal article supplement (doi:10.1039/d0cc04819d), 2020-01-01
Supplement: d0cc04819d1.pdf [file d0cc04819d1.pdf]

## Electronic Supplementary Information

### Histidine-Triggered Turning-On of Gold/Copper Nanoclusters Fluorescence for Sensitive and Selective Detection of Histidine

Yuanyuan Cai<sup>a</sup>, Jin Wang<sup>b</sup>, Chongyang Liu<sup>a</sup>, Shuqing Yang<sup>a</sup>, Yujiao Zhang<sup>a</sup>, and Aihua Liu<sup>a\*</sup>

<sup>a</sup>School of Pharmacy, Medical College, and Institute for Chemical Biology & Biosensing, and College of Life Sciences, Qingdao University, 308 Ningxia Road, Qingdao 266071, China

<sup>b</sup>Qingdao Institute for Food and Drug Control, 7 Longde Road, Qingdao 266073, China

\*Corresponding author. E-mail: liuah@qdu.edu.cn.

### Contents

Supplementary information includes the experimental details including the materials and apparatus, the synthesis of Au/Cu NCs, characterization of His-induced fluorescence turn-on, and calibration curve and fluorimetric analysis of His in real samples. Figures are provided for the synthetic conditions of Au/Cu NCs, and the optimization of analysis conditions. Tables are provided for comparison of analytical performance for His and analysis of His in real samples.

# 1. Experimental section

## Materials and reagents

Bovine serum albumin (BSA), copper sulfate pentahydrate ( $\text{CuSO}_4 \cdot 5\text{H}_2\text{O}$ ), and tetrachloroauric acid ( $\text{HAuCl}_4$ , 99.9%) were bought from Sigma–Aldrich (Shanghai, China). Histidine (His), methionine (Met), asparagines (Asn), alanine (Ala), lysine (Lys), serine (Ser), leucine (Leu), glycine (Gly), phenylalanine (Phe), tryptophan (Trp), threonine (Thr), glutamate (Glu), arginine (Arg), tryptophan (Try), valine (Val), and cysteine (Cys) as well as glutathione (GSH) were obtained from Sinopharm Chemical Reagent Co., Ltd (Shanghai, China). All of the other chemicals are of analytical grade, and all glasswares were cleaned by aqua regia and ultrapure water before use.

## Apparatus

The fluorescence spectra were performed with F-7000 Fluorescence spectrophotometer (Hitachi, Japan). The absorbance spectra were conducted using U-2910 spectrophotometer (Hitachi, Japan). The morphology of Au/Cu NCs was characterized with a transmission electron microscope (TEM) (Tecnai G2 F20 S-TWIN, FEI, USA) at 100 kV.

## To prepare Au/Cu NCs

10 mM of  $\text{HAuCl}_4$  solution (2.0 mL) was added into BSA aqueous solution (2.0 mL, 20  $\text{mg mL}^{-1}$ ) under vigorous stirring for 15 min. Then,  $\text{CuSO}_4$  solution (0.80 mL, 9.0 mM) was dropwise syringed into above solution under vigorous stirring at 37 °C. Afterwards, 1 M NaOH solution (0.20 mL) was introduced into above mixture and incubated at 37 °C for 8 h. Finally, the resultant solution was dialyzed against water for 24 h. The thus-yielded Au/Cu NCs was stored in darkness at 4 °C.

## To characterize His-induced fluorescence turn-on

The His-induced fluorimetric turn-on efficiencies were recorded by an F-7000 Fluorescence spectrophotometer. Fluorimetric turn-on efficiency =  $(F-F_0)/F_0 \times 100\%$ , where  $F_0$

and  $F$  are meant fluorimetric intensities of the Au/Cu NCs without and with His, respectively. The detection conditions for His were optimized, including concentrations of Au/Cu NCs, pH values, temperature and ionic strengths. The control experiments were performed by mixing Au/Cu NCs separately with His (500 nM) or different substates (each 10  $\mu$ M) of amino acids (Met, Cys, Ala, Lys, Arg, Asp, Ser, Thr, Leu, Phe, Trp, Glu, Tyr, Gly, Val, and Asn) and GSH, their fluorescence intensities at 620 nm were measured for comparison.

#### **Calibration curve and fluorimetric analysis of His in real samples.**

Au/Cu NCs (100  $\mu$ L, 2.0 mM) and His (100  $\mu$ L, 500 nM) were mixed, fluorescence emission peaks at 620 nm were measured. The fluorescence turn-on efficiency was calculated. After that, the experimental procedure was the same as above, except to change the concentration of His.

The real sample was measured by standard addition method. Blood and urine samples, which were provided by the affiliated hospital of Qingdao University by collecting from healthy volunteers with informed consent. First, His standard solution was added to the sample solution, and then calculated recovery after measurement, in which experimental conditions are all optimized.

## 2. Supplementary figures:

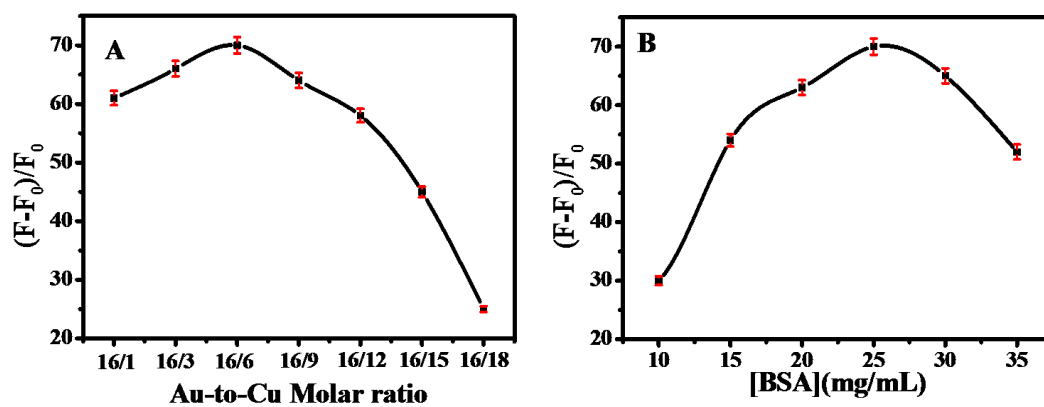

**Fig S1.** Effects of (A) Au-to-Cu molar ratio and (B) BSA dosage on the preparation of Au/Cu NCs on the fluorimetric turn-on efficiencies.

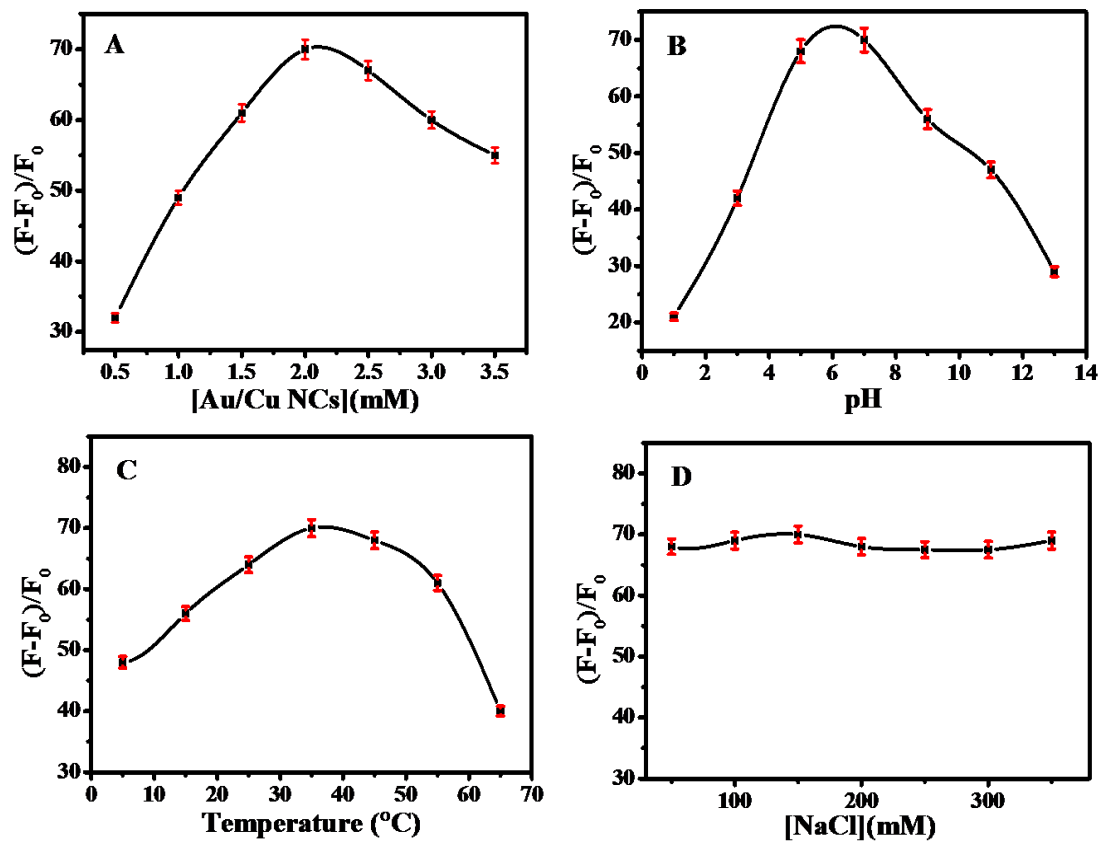

**Fig S2.** Effects of (A) Au/Cu NCs dosage, (B) buffer pH, (C) Temperature, and (D) ionic strength (in NaCl concentration) on the fluorimetric turn-on efficiencies of Au/Cu NCs-His. Au/Cu NCs, 2.0 mM; His, 500 nM.

### 3. Supplementary Tables:

**Table S1.** Comparison of analytical performance for His by different methods

| Materials                            | Analysis methods | Linear range (nM) | LODs (nM) | Reference |
|--------------------------------------|------------------|-------------------|-----------|-----------|
| Imidazole-functionalized silicon QDs | Colorimetry      | 10–1000           | 10        | 1         |
| SAA-AgNPs                            | Colorimetry      | 500–3500          | 57        | 2         |
| MWCNTs                               | Electroanalysis  | 200–10000         | 5.8       | 3         |
| Cu MOFs                              | Electroanalysis  | 100– 200000       | 25        | 4         |
| Nitrogen-doped carbon nanoparticle   | Fluorimetry      | 500–60000         | 150       | 5         |
| ZnS QDs                              | Fluorimetry      | 1250–30000        | 740       | 6         |
| Pyrene–naphthalene conjugate         | Fluorimetry      | 10–10000          | 10        | 7         |
| Vitamin B6 derivative                | Fluorimetry      | 0-3000            | 300       | 8         |
| Au/Cu NCs                            | Fluorimetry      | 3.0 –10000        | 0.9       | This work |

**Table S2** Analysis of His in real samples

| Sample      | Spiked ( $\mu\text{M}$ ) | Detected ( $\mu\text{M}$ ) | RSD (% , n=5) | Recovery (%) |
|-------------|--------------------------|----------------------------|---------------|--------------|
| Urine       | 0                        | $0.58 \pm 0.018$           | 3.07          | —            |
|             | 2                        | $2.53 \pm 0.066$           | 2.60          | 97.5         |
|             | 4                        | $4.65 \pm 0.096$           | 2.06          | 101.75       |
| Human serum | 0                        | $0.98 \pm 0.031$           | 3.19          | —            |
|             | 2                        | $3.19 \pm 0.093$           | 2.93          | 110.5        |
|             | 4                        | $5.19 \pm 0.098$           | 2.28          | 105.25       |

## References

1. J. Wang, R. Li, X. Long, Z. Li, *Sens. Actuators, B*, 2016, **237**, 740-748.
2. P. Huang, J. Li, J. Song, N. Gao and F. Wu, *Microchim. Acta*, 2016, **183**, 1865-1872.
3. Z. Zhang, Y. Hu, H. Zhang, L. Luo and S. Yao, *Biosens. Bioelectron.*, 2011, **26**, 696-702.
4. Y. Hua, Y. Cai, H. Liu, Y. Wan and H. Wang, *Nanoscale*, 2019, **237**, 740-748.
5. X. Zhu, T. Zhao, Z. Nie, Z. Miao, Y. Liu and S. Yao, *Nanoscale*, 2016, **8**, 2205-2211.
6. W. Bian, F. Wang, Y. Wei, L. Wang and M. M. F. Choi, *Anal. Chim. Acta*, 2015, **856**, 82-89.
7. S. Das, A. Sahana, S. Lohar, *RSC Adv.*, 2014, **4**, 7495-7499.
8. Elisabete Oliveira, Carla Santos, Patrícia Poeta, José Luis Capelo and Carlos Lodeiro, *Analyst*, 2013, **138**, 3642-3645.
